# Supplementary material for: Effect of Formulation on the Binding Efficiency and Selectivity of Precipitation Molecularly Imprinted Polymers
Source: PubMed Central journal article supplement (PMC6278369; doi:10.3390/molecules23112996), 2018-11-16
Supplement: molecules-23-02996-s001.pdf [file molecules-23-02996-s001.pdf]

## **Effect of Formulation on the Binding Efficiency and Selectivity of Precipitation MIPs**

K. Fremielle Lim and Clovia I. Holdsworth

Discipline of Chemistry, School of Environmental and Life Sciences, University of Newcastle,  
Callaghan, NSW 2308 Australia

Fax: +612 49215472; Tel: +612 9215481; E-mail: [Clovia.Holdsworth@newcastle.edu.au](mailto:Clovia.Holdsworth@newcastle.edu.au)

### **Electronic Supplementary Information**

**Table S1.** Imprinting results of polymers synthesized from various template:functional monomer (TM), functional monomer:cross-linker (MX) and initiator:total monomer (IM) ratios.

| Experiments                                |                    | Incorporated components in the polymers |                |                | Polymer Composition<br>T :FM : XL <sup>1</sup> | Degree of Cross-linking <sup>2</sup> | Hydro-dynamic size, $d_H$ (PDI) |
|--------------------------------------------|--------------------|-----------------------------------------|----------------|----------------|------------------------------------------------|--------------------------------------|---------------------------------|
|                                            |                    | % incorporation ( $\mu\text{mol}$ )     |                |                |                                                |                                      |                                 |
|                                            |                    | EGDMA                                   | MAA            | Template       |                                                |                                      |                                 |
| <b>TM2</b>                                 | MIP <sub>CAF</sub> | 90 ± 1<br>(375)                         | 79 ± 1<br>(66) | 70 ± 1<br>(29) | 0.44:1:6                                       | 68.1 ± 0.01                          | 66 ± 1<br>(1.0)                 |
|                                            | MIP <sub>THP</sub> | 92 ± 1<br>(382)                         | 75 ± 1<br>(63) | 76 ± 1<br>(32) | 0.51:1:6                                       | 62.3 ± 0.01                          | 70 ± 1<br>(1.0)                 |
|                                            | NIP                | 83 ± 7<br>(347)                         | 75 ± 2<br>(62) |                | 1:5.58                                         | 70.3 ± 0.06                          | 104 ± 1<br>(0.4)                |
| <b>TM4/<br/>MX5/<br/>IM100<sup>3</sup></b> | MIP <sub>CAF</sub> | 89 ± 2<br>(369)                         | 80 ± 2<br>(67) | 18 ± 1<br>(4)  | 0.06:1:5.53                                    | 71.0 ± 0.01                          | 114<br>(0.3)                    |
|                                            | MIP <sub>THP</sub> | 85 ± 2<br>(359)                         | 77 ± 1<br>(64) | 49 ± 2<br>(10) | 0.16:1:5.10                                    | 69.7 ± 0.01                          | 100 ± 1<br>(0.3)                |
|                                            | NIP                | 92 ± 2<br>(384)                         | 80 ± 1<br>(67) |                | 1:5.77                                         | 71.0 ± 0.01                          | 93 ± 1<br>(1.0)                 |
| <b>TM6</b>                                 | MIP <sub>CAF</sub> | 87 ± 2<br>(362)                         | 74 ± 3<br>(62) | 35 ± 1<br>(5)  | 0.08:1:5.85                                    | 63.3 ± 0.01                          | 99 ± 2<br>(0.)                  |
|                                            | MIP <sub>THP</sub> | 90 ± 2<br>(373)                         | 77 ± 2<br>(64) | 49 ± 1<br>(7)  | 0.11:1:5.82                                    | 60.6 ± 0.01                          | 85 ± 1<br>(0.5)                 |
|                                            | NIP                | 92 ± 2<br>(382)                         | 88 ± 4<br>(73) |                | 1:5.24                                         | 63.3 ± 0.01                          | 93 ± 1<br>(0.2)                 |
| <b>TM8</b>                                 | MIP <sub>CAF</sub> | 93 ± 1<br>(387)                         | 87 ± 1<br>(72) | 64 ± 1<br>(7)  | 0.09:1:5.36                                    | 62.3 ± 0.01                          | 75 ± 1<br>(0.8)                 |
|                                            | MIP <sub>THP</sub> | 93 ± 2<br>(386)                         | 82 ± 1<br>(69) | 77 ± 1<br>(8)  | 0.12:1:5.63                                    | 61.0 ± 0.01                          | 98 ± 2<br>(0.3)                 |
|                                            | NIP                | 86 ± 2<br>(360)                         | 79 ± 1<br>(65) |                | 1:5.57                                         | 68.7 ± 0.01                          | 89 ± 1<br>(0.5)                 |
| <b>MX10</b>                                | MIP <sub>CAF</sub> | 88 ± 1<br>(409)                         | 70 ± 1<br>(32) | 35 ± 1<br>(4)  | 0.08:1:12.60                                   | 63.8 ± 0.1                           | 117 ± 1<br>(0.2)                |
|                                            | MIP <sub>THP</sub> | 86 ± 2<br>(392)                         | 61 ± 1<br>(28) | 32 ± 1<br>(4)  | 0.13:1:14.15                                   | 75.7 ± 0.1                           | 114 ± 1<br>(0.2)                |
|                                            | NIP                | 86 ± 2<br>(390)                         | 79 ± 2<br>(36) |                | 1:10.89                                        | 63.3 ± 0.1                           | 128 ± 1<br>(0.5)                |

<sup>1</sup>T:fM:X = template : functional monomer : cross-linker (mol) ratio in the polymers, <sup>2</sup>Degree of cross-linking compared to the initial ratio -C=C- and -C=O- and in the polymers. <sup>3</sup> Polymers produced using T:fM = 1:4, fM:X = 1:5 and I:tM of 1:100.

**Table S1 (continuation).** Imprinting results of polymers synthesized from various template:functional monomer (TM), functional monomer:cross-linker (MX) and initiator:total monomer (IM) ratios.

| Experiments   |                    | Incorporated components in the polymers |                 |                | Polymer Composition<br>T :FM : XL <sup>1</sup> | Degree of Cross-linking <sup>2</sup> | Hydro-dynamic size, $d_H$ (PDI) |
|---------------|--------------------|-----------------------------------------|-----------------|----------------|------------------------------------------------|--------------------------------------|---------------------------------|
|               |                    | % incorporation ( $\mu\text{mol}$ )     |                 |                |                                                |                                      |                                 |
|               |                    | EGDMA                                   | MAA             | Template       |                                                |                                      |                                 |
| <b>MX2</b>    | MIP <sub>CAF</sub> | 93 ± 2<br>(311)                         | 78 ± 2<br>(130) | 10 ± 2<br>(4)  | 0.03:1:2.41                                    | 49.6 ± 0.1                           | 84 ± 1<br>(0.1)                 |
|               | MIP <sub>THP</sub> | 93 ± 2<br>(310)                         | 83 ± 2<br>(138) | 31 ± 0<br>(13) | 0.09:1:2.26                                    | 57.7 ± 0.1                           | 67 ± 1<br>(0.1)                 |
|               | NIP                | 93 ± 2<br>(366)                         | 84 ± 1<br>(57)  |                | 1:2.21                                         | 59.1 ± 0.1                           | 89 ± 1<br>(0.5)                 |
| <b>IM5</b>    | MIP <sub>CAF</sub> | 98 ± 1<br>(410)                         | 92 ± 2<br>(77)  | 26 ± 1<br>(12) | 0.07:1:5.33                                    | 67.5 ± 0.01                          | 136 ± 1<br>(0.2)                |
|               | MIP <sub>THP</sub> | 98 ± 1<br>(410)                         | 93 ± 2<br>(77)  | 50 ± 1<br>(10) | 0.13:1:5.33                                    | 68.4 ± 0.01                          | 132 ± 1<br>(0.2)                |
|               | NIP                | 98 ± 1<br>(409)                         | 88 ± 2<br>(73)  |                | 1:5.58                                         | 73.6 ± 0.06                          | 122 ± 1<br>(0.3)                |
| <b>IM10</b>   | MIP <sub>CAF</sub> | 96 ± 1<br>(401)                         | 84 ± 2<br>(70)  | 21 ± 1<br>(4)  | 0.06:1:5.75                                    | 72.2 ± 0.01                          | 121 ± 1<br>(0.6)                |
|               | MIP <sub>THP</sub> | 96 ± 0<br>(398)                         | 82 ± 1<br>(69)  | 52 ± 3<br>(11) | 0.16:1:5.81                                    | 73.1 ± 0.01                          | 102 ± 1<br>(0.6)                |
|               | NIP                | 97 ± 1<br>(404)                         | 83 ± 1<br>(69)  |                | 1:5.83                                         | 69.4 ± 0.01                          | 83 ± 2<br>(1.0)                 |
| <b>IM500</b>  | MIP <sub>CAF</sub> | 64 ± 2<br>(266)                         | 56 ± 0<br>(47)  | 16 ± 1<br>(3)  | 0.10:1:5.37                                    | 67.3 ± 0.01                          | 104 ± 1<br>(0.3)                |
|               | MIP <sub>THP</sub> | 61 ± 2<br>(256)                         | 57 ± 2<br>(48)  | 22 ± 0<br>(5)  | 0.07:1:5.69                                    | 65.2 ± 0.01                          | 94 ± 1<br>(0.3)                 |
|               | NIP                | 88 ± 2<br>(366)                         | 69 ± 1<br>(57)  |                | 1:6.41                                         | 67.3 ± 0.01                          | 140 ± 1<br>(0.3)                |
| <b>IM1000</b> | MIP <sub>CAF</sub> | 40 ± 0<br>(165)                         | 39 ± 2<br>(32)  | 8 ± 1<br>(2)   | 0.05:1:5.16                                    | 66.6 ± 0.01                          | 107 ± 1<br>(0.3)                |
|               | MIP <sub>THP</sub> | 43 ± 2<br>(179)                         | 38 ± 2<br>(32)  | 12 ± 1<br>(3)  | 0.08:1:5.64                                    | 67.4 ± 0.01                          | 90 ± 1<br>(0.3)                 |
|               | NIP                | 75 ± 3<br>(314)                         | 39 ± 2<br>(32)  |                | 1:9.70                                         | 62.3 ± 0.01                          | 119 ± 1<br>(0.3)                |

<sup>1</sup>T:fM:X = template : functional monomer : cross-linker (mol) ratio in the polymers, <sup>2</sup>Degree of cross-linking compared to the initial ratio -C=C- and -C=O- and in the polymers. <sup>3</sup>Polymers produced using T:fM = 1:4, fM:X = 1:5 and I:tM of 1:100.

**Table S2.** Polymer feed composition of the systems investigated from various template:functional monomer (TM), functional monomer:cross-linker (MX) and initiator:total monomer (IM) ratios.

| EXPT/Polymers                  | [template]<br>( $\mu\text{mol}$ ) | [FM]<br>( $\mu\text{mol}$ ) | [XL]<br>( $\mu\text{mol}$ ) | [initiator]<br>( $\mu\text{mol}$ ) | Volume<br>of<br>porogen<br>(mL) | T:FM:XL | I:TM   |
|--------------------------------|-----------------------------------|-----------------------------|-----------------------------|------------------------------------|---------------------------------|---------|--------|
| <b>IM1000</b>                  |                                   |                             |                             | 0.50                               |                                 |         | 1:1000 |
| <b>IM500</b>                   |                                   |                             |                             | 1.0                                |                                 |         | 1:500  |
| <b>IM100,<br/>MX5,<br/>TM4</b> | 20.80                             | 83.33                       | 416.67                      | 5.00                               |                                 | 1:4:20  | 1:100  |
| <b>IM10</b>                    |                                   |                             |                             | 50.00                              |                                 |         | 1:10   |
| <b>IM5</b>                     |                                   |                             |                             | 100.00                             | 5.00                            |         | 1:5    |
| <b>MX2</b>                     | 42.00                             | 167.00                      | 333.00                      |                                    |                                 | 1:4:8   |        |
| <b>MX10</b>                    | 14.00                             | 45.00                       | 455.00                      |                                    |                                 | 1:40:40 |        |
| <b>TM2</b>                     | 42.00                             |                             |                             | 5.00                               |                                 | 1:2:10  | 1:100  |
| <b>TM6</b>                     | 21.00                             | 83.00                       | 416.67                      |                                    |                                 | 1:4:20  |        |
| <b>TM8</b>                     | 10.00                             |                             |                             |                                    |                                 | 1:8:40  |        |

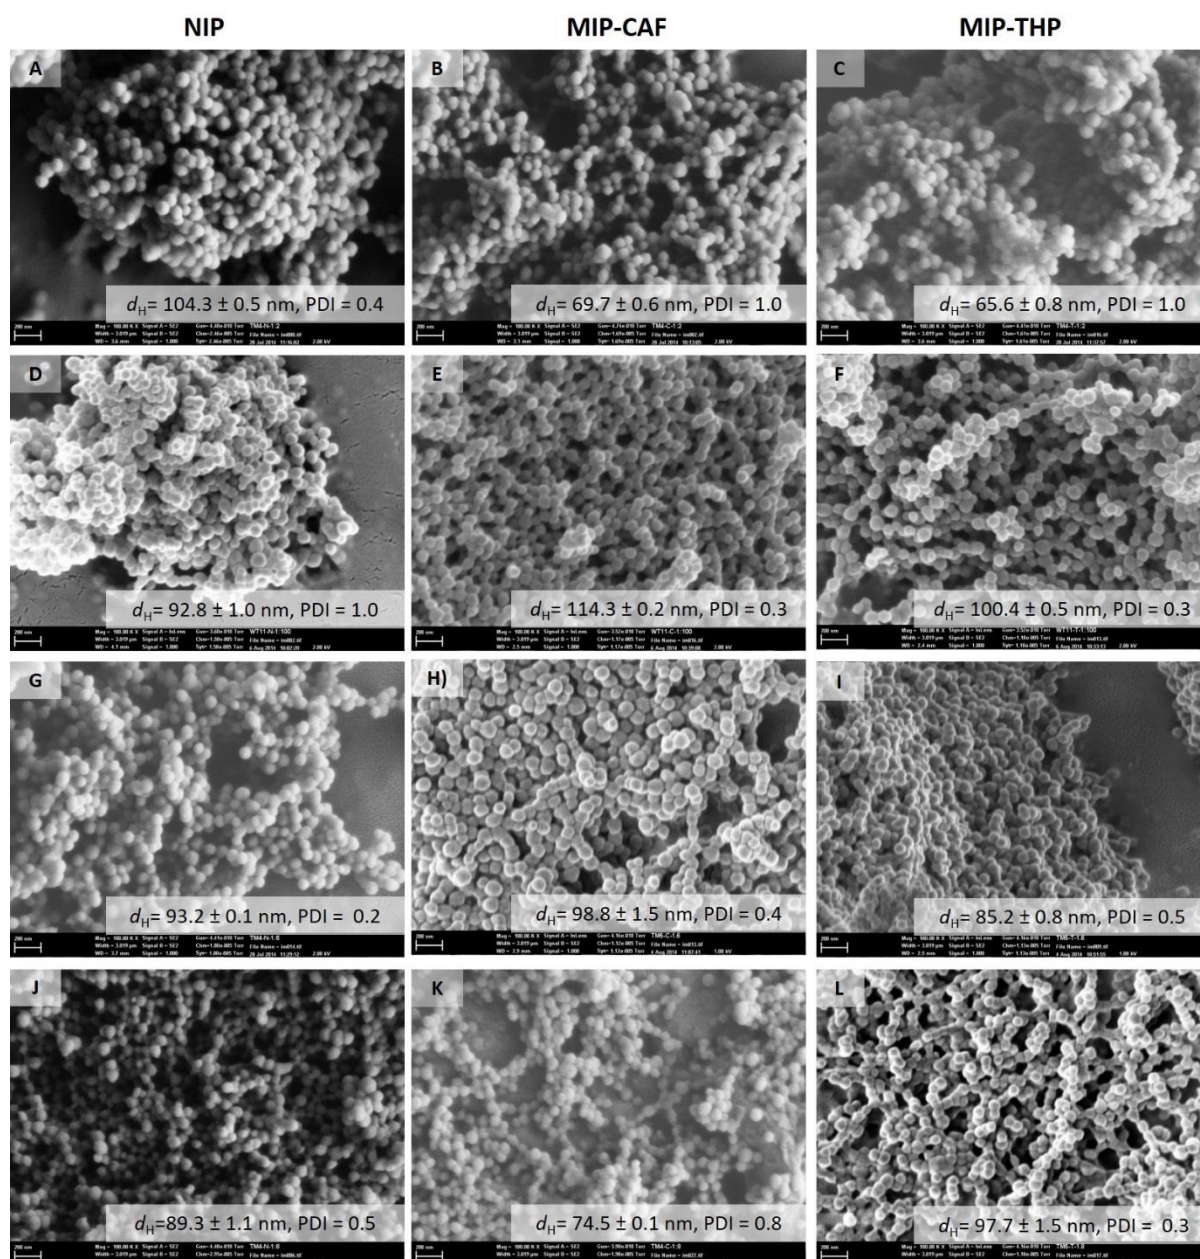

**Figure S1.** SEM images of microspheres synthesized from various template: functional monomer (T:fM) ratios: (A) TM2<sub>NIP</sub>, (B) TM2<sub>CAF</sub>, (C) TM2<sub>THP</sub>, (D) TM4<sub>NIP</sub>, (E) TM4<sub>CAF</sub>, (F) TM4<sub>THP</sub>, (G) TM6<sub>NIP</sub>, (H) TM6<sub>CAF</sub>, (I) TM6<sub>THP</sub>, (J) TM8<sub>NIP</sub>, (K) TM8<sub>CAF</sub> and (L) TM8<sub>THP</sub>. Scale bar represents 200  $\mu$ m at 100000x magnification. Insets are the hydrodynamic size of the microspheres with the corresponding polydispersity indexes (PDI) measured by DLS.

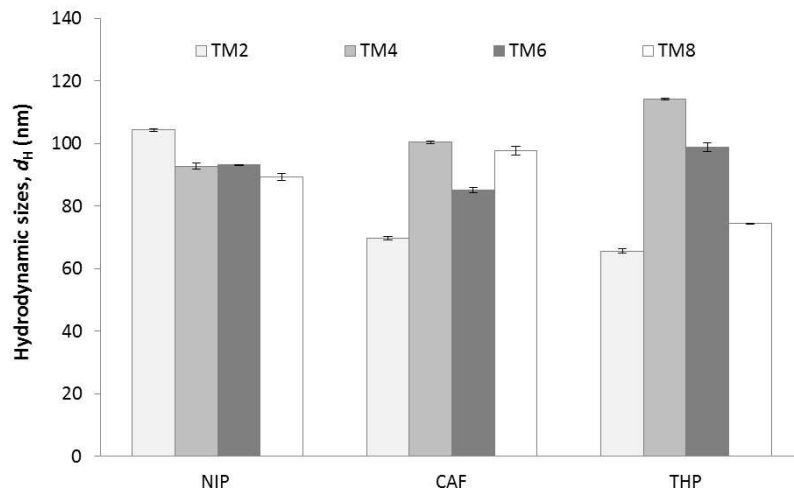

**Figure S2.** Hydrodynamic sizes,  $d_H$ , of microspheres synthesized from various T:fM ratios. Measurements were conducted using Dynamic Light scattering (DLS) and acetonitrile as the dispersant.

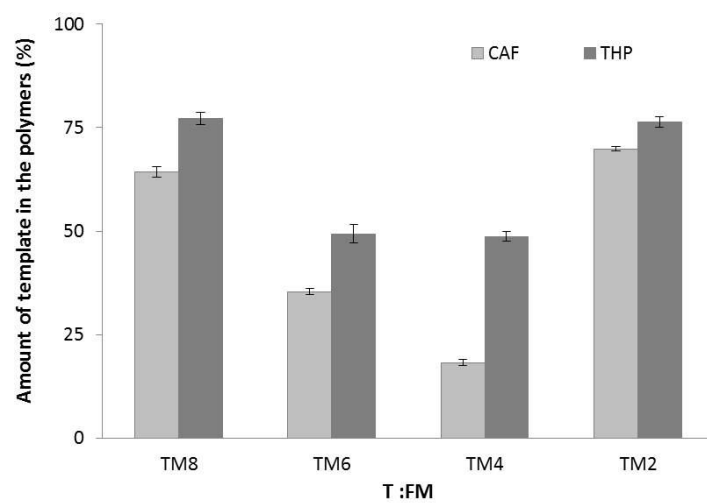

**Figure S3.** CAF and THP incorporated in the polymers from various T:fM ratios measured by  $^1\text{H}$  NMR using 1,4-dioxane in  $\text{DMSO-}d_6$  as the reference standard.

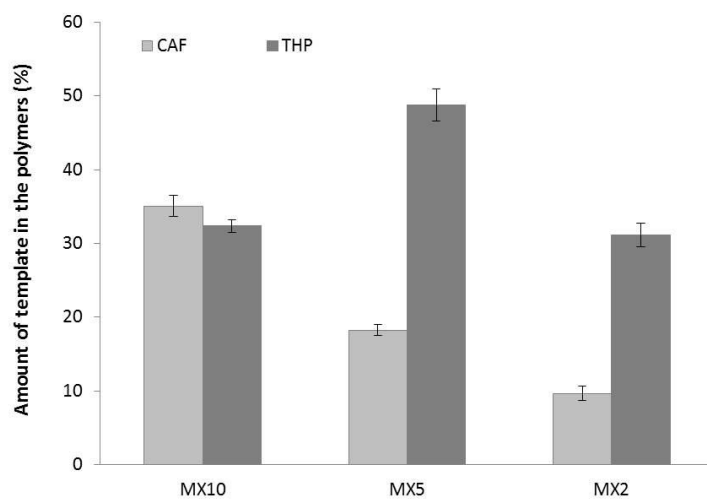

**Figure S4.** CAF and THP incorporated in the polymers from various fM:X ratios. Measured by  $^1\text{H}$  NMR using 1,4-dioxane in  $\text{DMSO-}d_6$  as the reference standard.



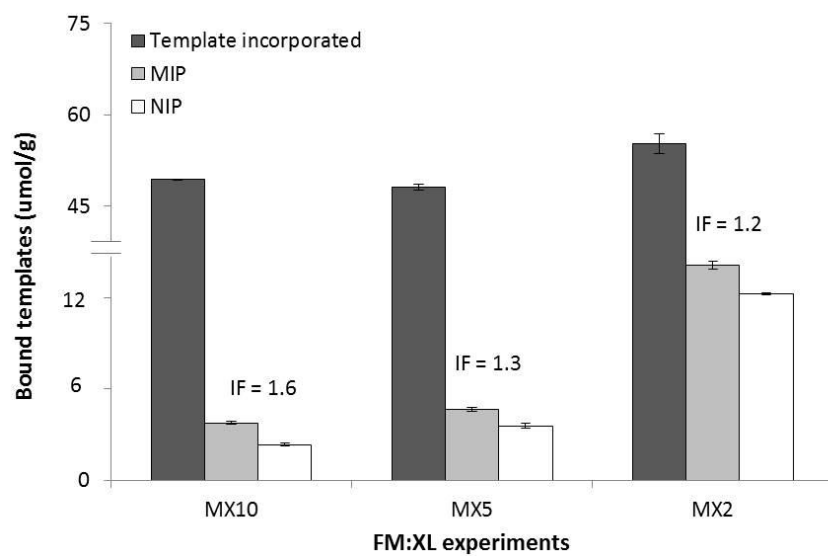

**Figure S5.** CAF incorporation and rebinding of MIPs and NIPs prepared from various fM:X ratios. Polymers were incubated for 18 hours in 100µM template rebinding solution and the post rebinding solutions were analyzed by HPLC.

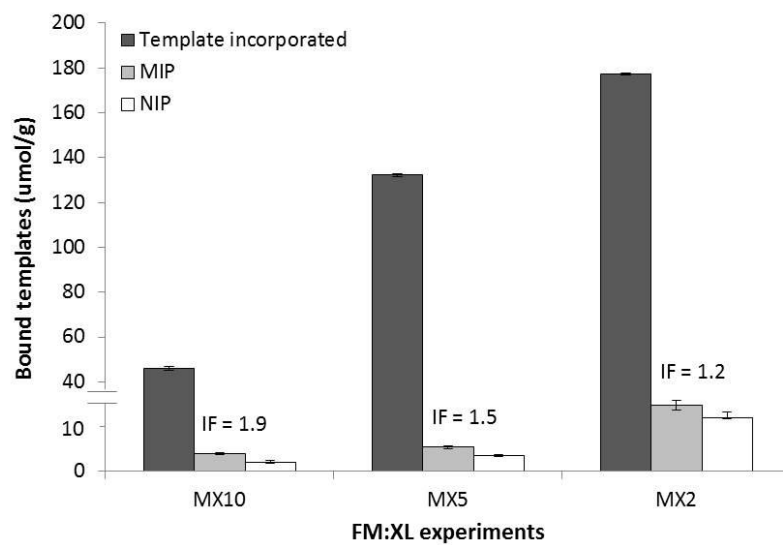

**Figure S6.** THP incorporation and rebinding of MIPs and NIPs prepared from various fM:X ratios. Polymers were incubated for 18 hours in 100 $\mu$ M template rebinding solution and the post rebinding solutions were analysed by HPLC.

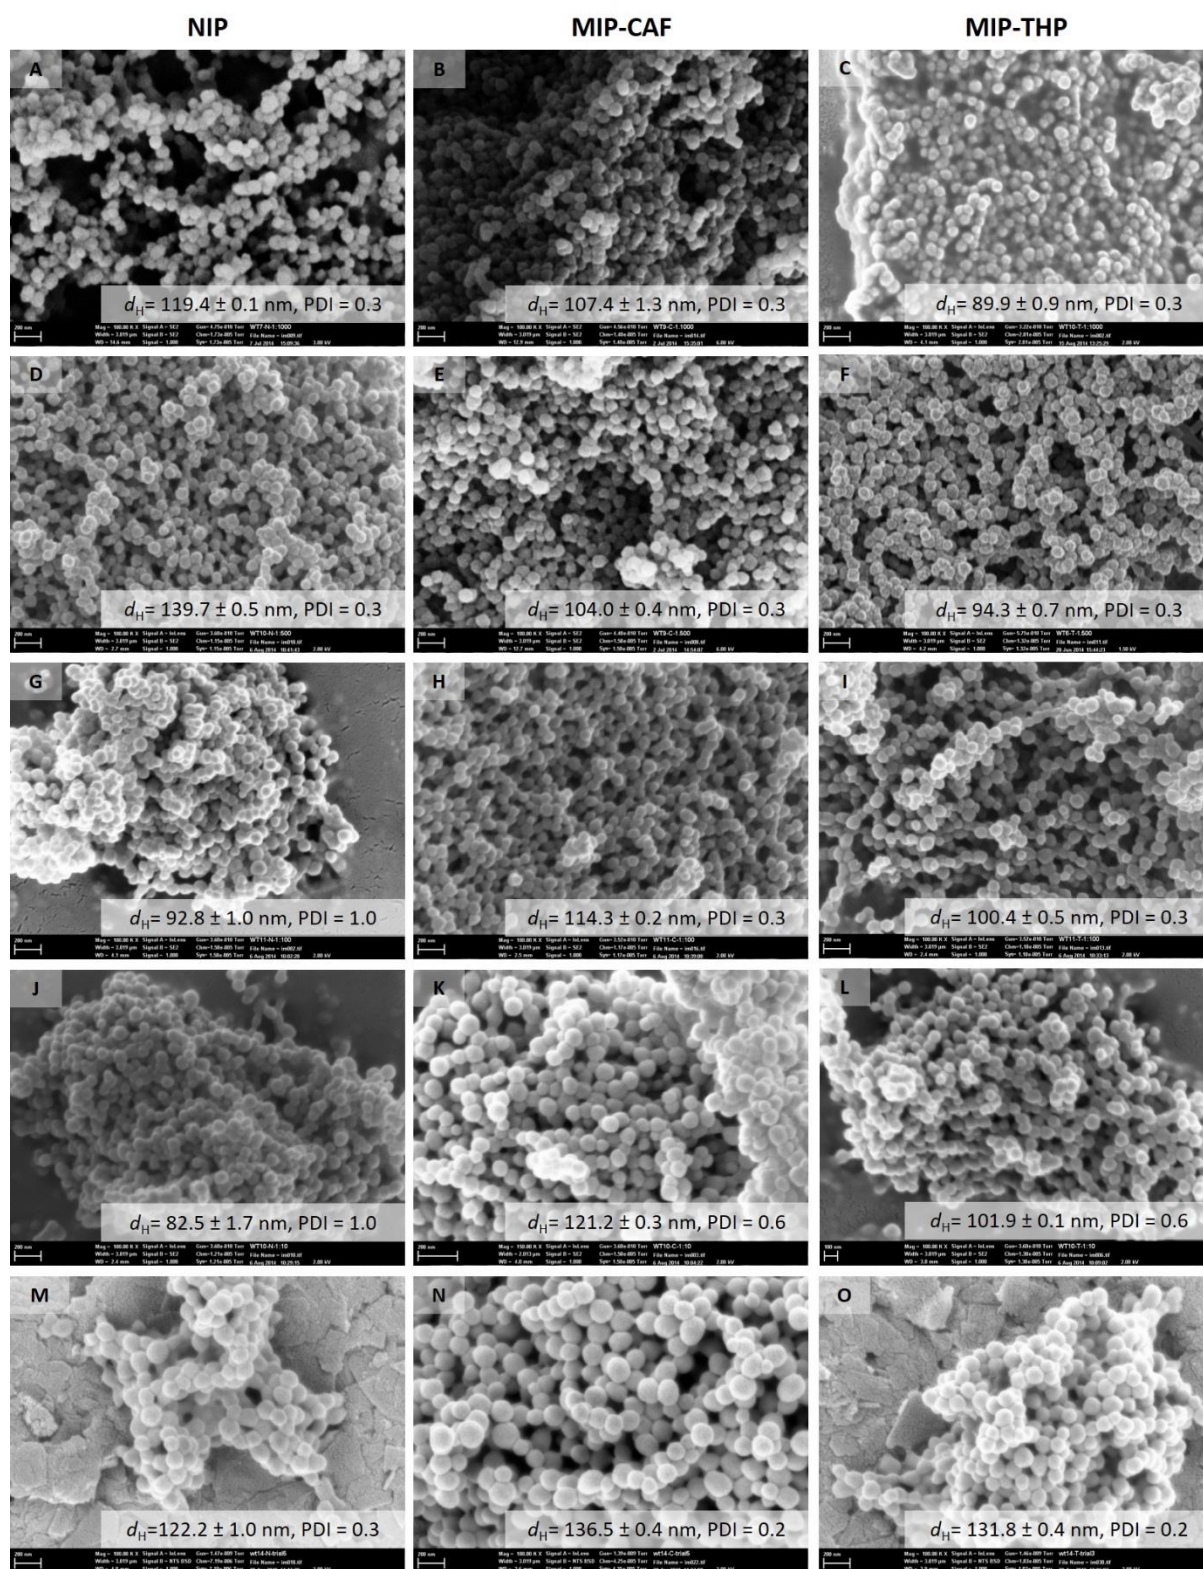

**Figure S7.** SEM images of microspheres synthesized from various initiator:total monomer (I:tM) ratios: (A) IM1000<sub>NIP</sub>, (B) IM1000<sub>CAF</sub>, (C) IM1000<sub>THP</sub>, (D) IM500<sub>NIP</sub>, (E) IM500<sub>CAF</sub>, (F) IM500<sub>THP</sub>, (G) IM100<sub>NIP</sub>, (H) IM100<sub>CAF</sub>, (I) IM100<sub>THP</sub>, (J) IM10<sub>NIP</sub>, (K) IM10<sub>CAF</sub>, (L) IM10<sub>THP</sub>, (M) IM5<sub>NIP</sub>, (N) IM5<sub>CAF</sub> and (O) IM5<sub>THP</sub>. Scale bar represents 200  $\mu$ m at 100000x magnification. Insets are the hydrodynamic size of the microspheres with the corresponding polydispersity indexes (PDI) measured by DLS.

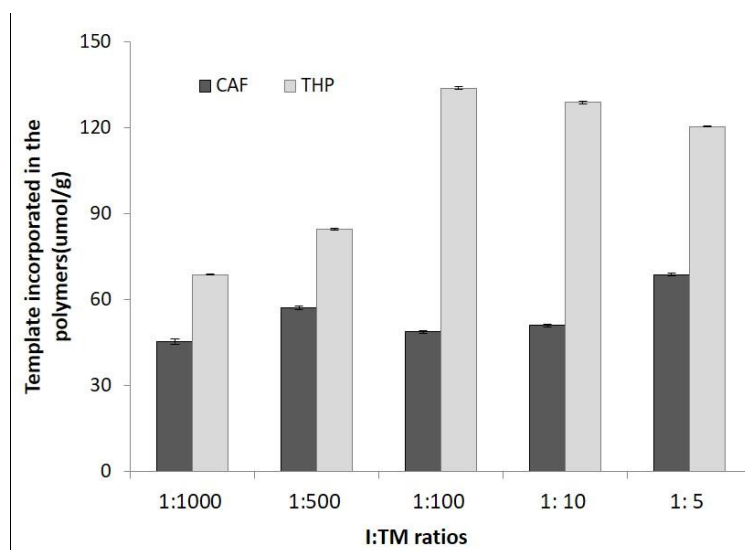

**Figure S8.** CAF and THP incorporation the polymers from various I:tM ratios measured by  $^1\text{H}$  NMR using 1,4-dioxane in  $\text{DMSO-}d_6$  as the reference standard.

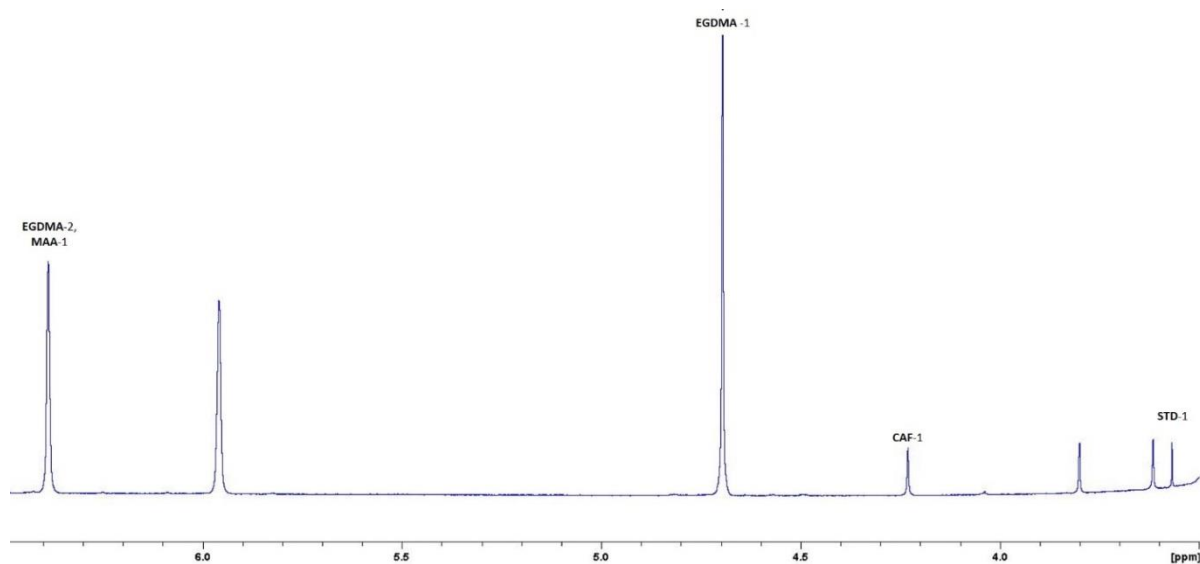

**Figure S9.** An example of a  $^1\text{H}$  NMR spectrum of the caffeine pre-polymerization solution. Peaks of the components are as follows; cross-linker (EGDMA, O- $\text{CH}_2$  signal) at 4.32 ppm, functional monomer (the combination of the signals of  $-\text{CH}_2=\text{CH}_2-$  of MAA and EGDMA) at 5.96 and 6.39 ppm and for caffeine at 4.23 ppm ( $-\text{N}-\text{CH}_3$ ).
